# Supplementary material
Source: Springer Nature journal article supplement (https://www.springermedizin.de/resource/supplementary/12936_2010_1436_MOESM1_ESM.pdf/9549800)

**CULTURAL IDENTITY**

**RELATIONSHIPS  
& EXPECTATIONS**

Person  
Extended Family  
Neighborhood

Perceptions  
Enablers  
Nurturers

Positive  
Existential  
Negative

**CULTURAL EMPOWERMENT**

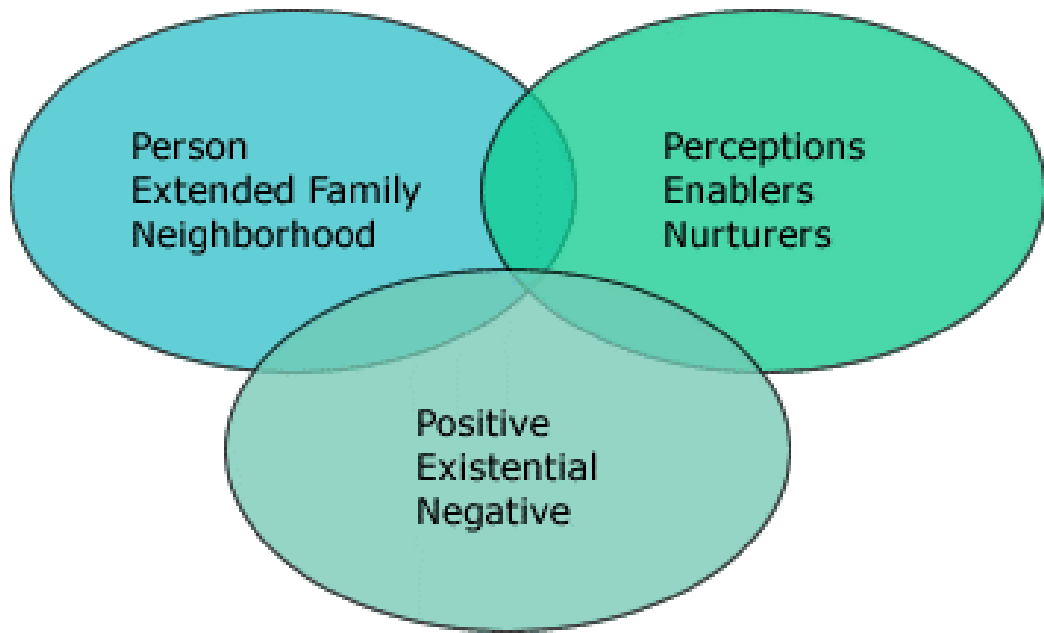

Supplement: MOESM1 [file 9549800]
